# Supplementary material
Source: PubMed Central journal article supplement (PMC4525701)
Supplement: NIHMS710161-supplement-Supp_MaterialS1.pdf [file NIHMS710161-supplement-Supp_MaterialS1.pdf]

**Supplemental Data** **Developmental Dynamics**  
 Poly Peak Parser  
 Four examples: Tbx2a line B11, 3ost5 line F96, 3ost5 line M21, Left2 line 19

Tbx2a line B11

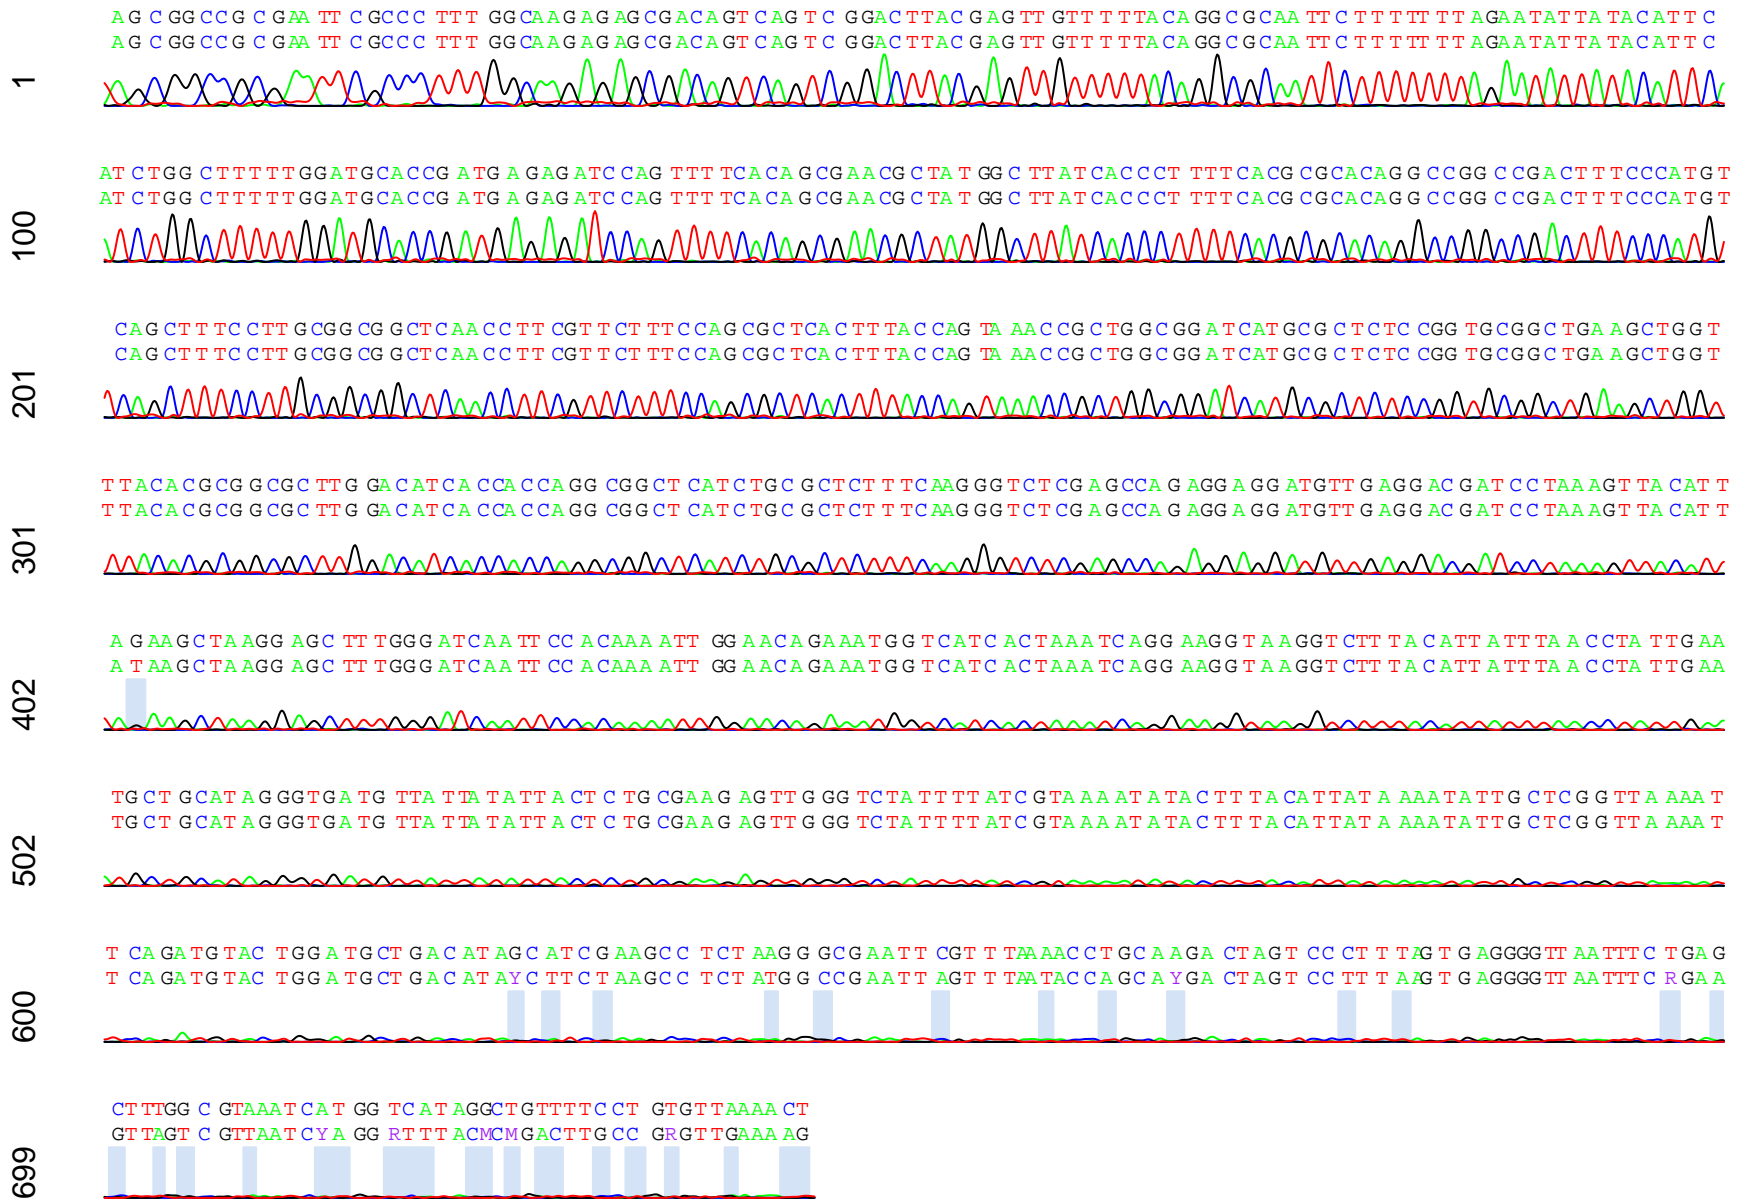



```
ATGAGAGATCCAGTTTTACAGCGAACGCTATGGCTTATCACCTTTTCACGCGCACAGGCCGGCCGACTTCCCATGTCAGCTTTCCTTGCGGGGGCTCAACCTTCGTTCTTTCCAGCG  
CTCACTTTACCACCGGTCTCAGTAAACCGCTGGCGGATCATGCGCTCTCCGGTGC GGCTGAAGCTGGTTTACACGCGCGCTTGGACATCACCACCAGGCCGGCTCATCTGCGCTTTTC  
AAGGGTCTCGAGCCAGAGGAGGATGTTGAGGACGATCCTAAAGTTACATTAGAAGCTAAGGAGCTTTGGGATCAATTCACAAAAATTGGAACAGAAATGGTCATCACTAAATCAGGAAGG
```

### Alignment parameters

```
#####  
# Program: Biostrings (version 2.26.3), a Bioconductor package  
# Rundate: Thu May 22 20:25:16 2014  
#####  
#=====  
#  
# Aligned_sequences: 2  
# 1: Alt Allele  
# 2: Reference  
# Matrix: NA  
# Gap_penalty: 12.0  
# Extend_penalty: 2.0  
#  
# Length: 360  
# Identity:      349/360 (96.9%)  
# Similarity:   NA/360 (NA%)  
# Gaps:         10/360 (2.8%)  
# Score: 1286
```

3ost5 line F96

GA TT GCG CAAA G G A GGC TCCA G G G CCC T C C T GG A GATG CTC AA CC TC CAT CCA GAT G TGG AAG TC G CCAA G AC TG AG AT CCA TTA C TT CAA CCT GG ATG AA  
GA TT GCG CAAA G G A GGC TCCA G G G CCC T C C T GG A GATG CTC AA CC TC CAT CCA GAT G TGG AAG TC G CCAA G AC TG AG AT CCA TTA C TT CAA CCT GG ATG AA

1

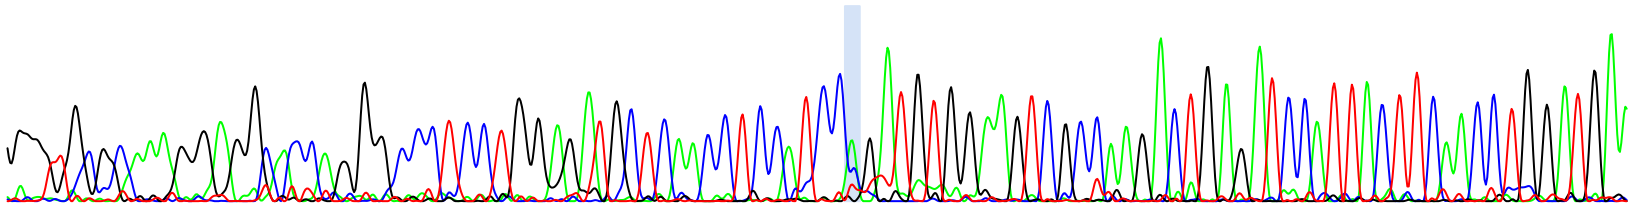

A CC TTT CGG AA GGG TCT GG ATT GG TAT CG ATC CCAG ATGCCAT CAC CCT T CCTGG GCAGCT GA CGGTG G AAAAGA CTCC TGG CTACT TCACAG C T CCA  
AAC TTT CGG AA GGG TCT GG ATT GG TAT CG ATC CCAG ATGCCAT CAC CCT T CCTGG GCAGCT GA CGGTG G AAAAGA CTCC TGG CTACT TCACAG C T CCA

103

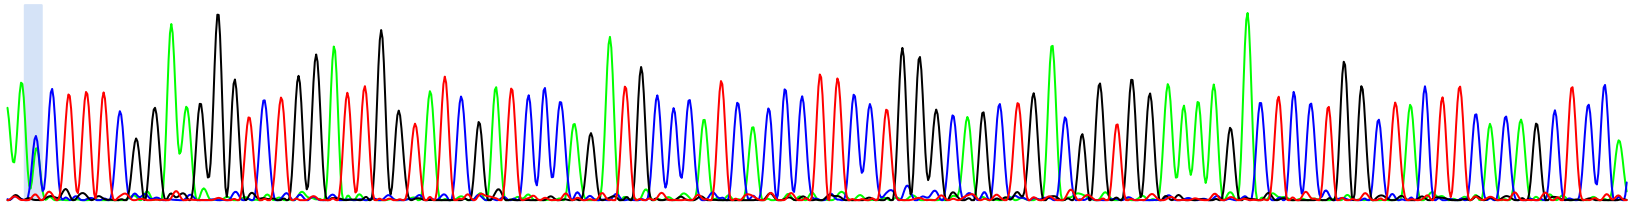

CCA GCC CCAA GGA GG A T TG G GG CCG TGA ATCCAT CAG TGA AACTGC TT TTGAT CA TTCG TGA CCCC CA CA GAG ACTCG CATCA AATTA TACACA G TTC  
CCA GCC CCAA GGA GG A T TG A TT T GAG CCA TGA AG CCA G CAATG AAA CT GCTTT TG ATCA TTC GTGA GCC GA CAGG GAGG T TCGT GTC AA GTTGT AC G CAA

202

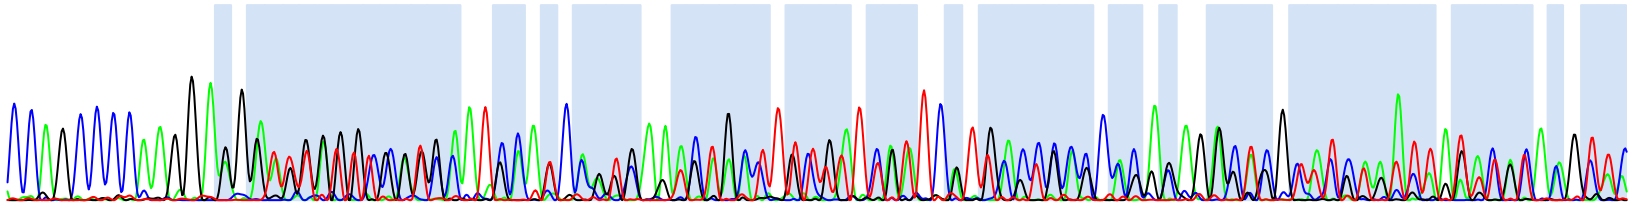

TCCC CCACC GAA TT CAT CCAA ACAAG CCA TACCAA CCA CT GAAAG AACTAC TGG TT TC TCTA GGACA  
GTTA TWCAC AAC CG AAG T AAG CAAA CAA GCC ATG CCA GC CG CTG AGAG GG CTCTT GC ATAC AAG

302

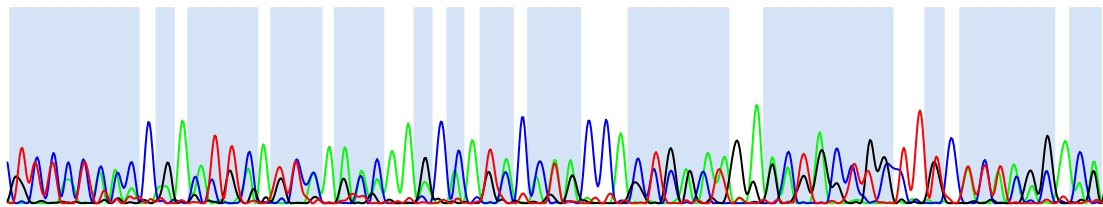

## Alignment

|            |     |                                                                                   |     |
|------------|-----|-----------------------------------------------------------------------------------|-----|
| Alt Allele | 4   | TGCGCAAAGGAGGCTACCAGGGCCCTCCTGGAGATGCTCAACCTCCATCCCGATGTGGAAGTCGCCAAGACTGAGATCCA  | 83  |
|            |     |                                                                                   |     |
| Reference  | 96  | TGCGCAAAGGAGGC-ACCAGGGCCCTCCTGGAGATGCTCAACCTCCATCCAGATGTGGAAGTCGCCAAGACCGAGATCCA  | 174 |
| Alt Allele | 84  | TTACTTCAACCTGGATGAAACCTTTTCGGAAGGGTCTGGATTGGTATCGATCCCAGATGCCATCACCTTCCTGGGCAGC   | 163 |
|            |     |                                                                                   |     |
| Reference  | 175 | TTACTTCAACCTGGATGAAAACCTTTTCGGAAGGGTCTGGATTGGTATCGATCCCAGATGCCATCACCTTCCTGGGCAGC  | 254 |
| Alt Allele | 164 | TGACGGTGGAAAAGACTCCTGGCTACTTCACAGCTCCACCAGCCCCAAGGAAGGAGGATTTGGGCCATGAATCCAGCAAT  | 243 |
|            |     |                                                                                   |     |
| Reference  | 255 | TGACAGTGGAAAAGACTCCTGGCTACTTCACAGCTCCACCAGCCCCAAGGA---GGATTTGGGCCATGAATCCAGCAGT   | 330 |
| Alt Allele | 244 | GAAACTGCTTTTGATCATTTCGTGACCCACAGAGAGGCTCGTATCAAGTTATACGCAAGTTCTYACAACCGAATTCAGC   | 323 |
|            |     |                                                                                   |     |
| Reference  | 331 | GAAACTGCTTTTGATCATTTCGTGACCCCGCAGAGAGGCTCGTATCAGATTATACGCAAGTTCTCCACAACCGAATTCAGC | 410 |
| Alt Allele | 324 | AAAACAAGCCATACCAGCCACTGAAAGAGCTGTTGCTTTCACAAG                                     | 368 |
|            |     |                                                                                   |     |
| Reference  | 411 | AAAACAAGCCATACCAGTCACTGGAAGAGCTGCTGCTTTCACAAG                                     | 455 |

## Alternative allele

GATTGCGCAAAGGAGGCTACCAGGGCCCTCCTGGAGATGCTCAACCTCCATCCCGATGTGGAAGTCGCCAAGACTGAGATCCATTACTTCAACCTGGATGAAACCTTTTCGGAAGGGTCTG  
GATTGGTATCGATCCCAGATGCCATCACCTTCCTGGGCAGCTGACGGTGGAAAAGACTCCTGGCTACTTCACAGCTCCACCAGCCCCAAGGAAGGAGGATTTGGGCCATGAATCCAGC  
AATGAAACTGCTTTTGATCATTTCGTGACCCACAGAGAGGCTCGTATCAAGTTATACGCAAGTTCTYACAACCGAATTCAGCAAAAAGCCATACCAGCCACTGAAAGAGCTGTTGCT  
TTCACAAG

## Reference sequence

ACAAGACACTTTGGACTTAGTGACTTCAGCGACACCTTCTGGACCTTCTAATGCTTCGACTTTGCAACGCTCTCCAGGGCCATCATCATCGGGGTGCGCAAAGGAGGCACCAGGGCCCT  
CCTGGAGATGCTCAACCTCCATCCAGATGTGGAAGTCGCCAAGACCGAGATCCATTACTTCAACCTGGATGAAACCTTTTCGGAAGGGTCTGGATTGGTATCGATCCCAGATGCCATCAC  
CCTTCCTGGGCAGCTGACAGTGGAAAAGACTCCTGGCTACTTCACAGCTCCACCAGCCCCAAGGAGGATTTGGGCCATGAATCCAGCAGTGAACCTGCTTTTGATCATTTCGTGACCCCGC  
AGAGAGGCTCGTATCAGATTATACGCAAGTTCTCCACAACCGAATTCAGCAAAAAGCCATACCAGTCACTGGAAGAGCTGCTGCTTTCACAAGGACACATCAACCCCAATACAAGGC  
CCTTCAGAGAAGTTTTTACTACCAGCACCTGGCCAGATGGTTGGAGCTTTTCCCGGAGAGCAGATACACATTGTGGATGGAGAAGCACTGATTTCGTAATCCATTCCCGAGCTGCAGAA  
AGCAGAGACTTTTTTGGAACTTCCGCCTCAGATAAAGCCGGACAACCTTCTACTTTAATGTACCAAGGGCTTTTATTGTATGCTGTCGGCAGGACATGACAAGTGCCTGGATGAGTCTAA  
AGGAAGGCCACATGCTCCACTTAGCAATGAGGCTTTCAGAAAGCTTTCAGGCTACTTGCAGTACCTAATCAAATCTTTTCCGAATGGTGGGACAGAGGTTG

### Alignment parameters

```
#####  
# Program: Biostrings (version 2.26.3), a Bioconductor package  
# Rupdate: Thu May 22 19:34:02 2014  
#####  
#=====  
#  
# Aligned_sequences: 2  
# 1: Alt Allele  
# 2: Reference  
# Matrix: NA  
# Gap_penalty: 12.0  
# Extend_penalty: 2.0  
#  
# Length: 365  
# Identity:      348/365 (95.3%)  
# Similarity:   NA/365 (NA%)  
# Gaps:         5/365 (1.4%)  
# Score: 699.8
```

3ost5 line M21

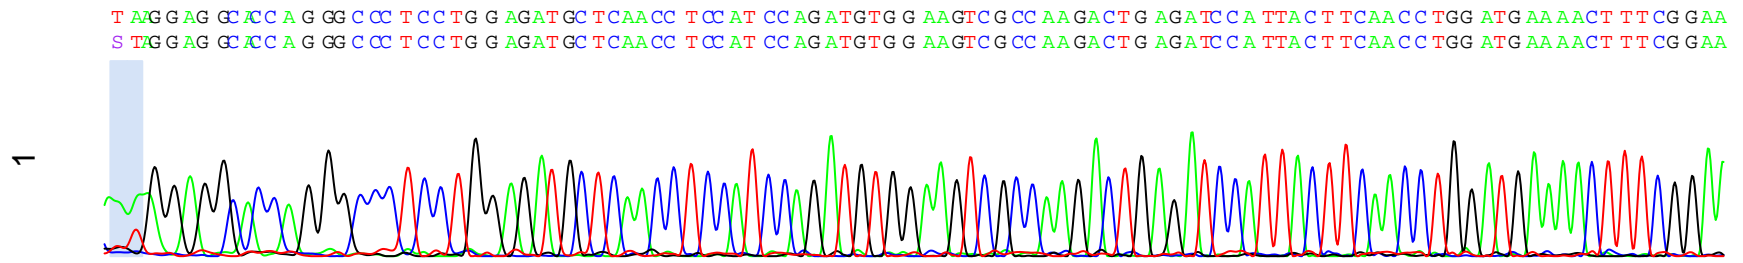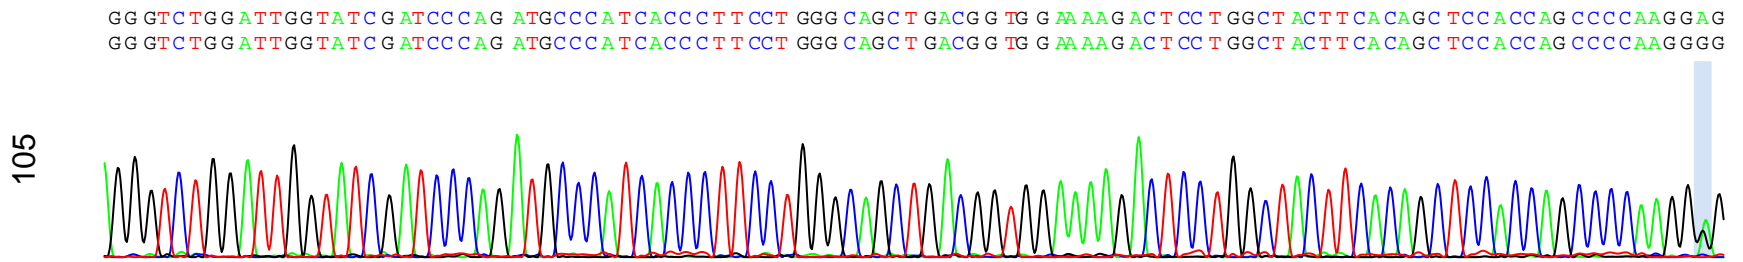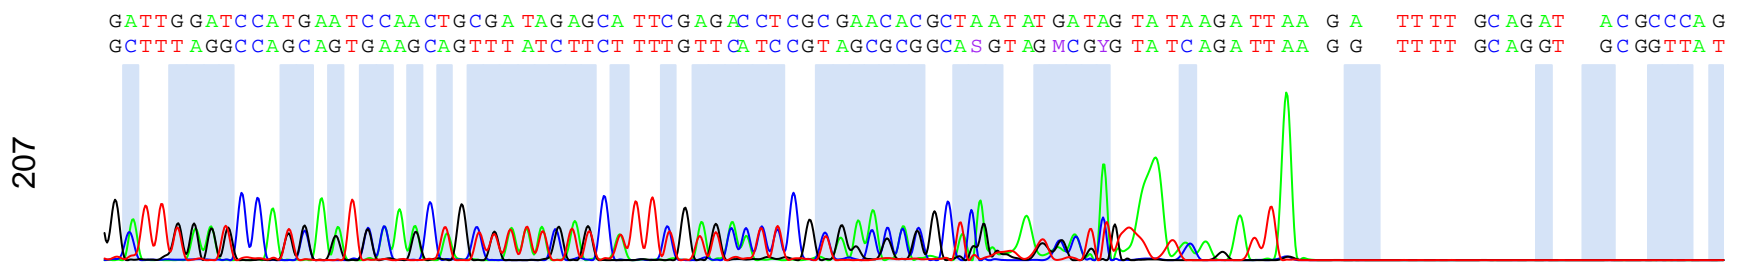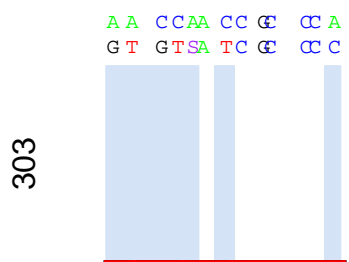

### Alignment

|            |     |                                                                                  |     |
|------------|-----|----------------------------------------------------------------------------------|-----|
| Alt Allele | 3   | AGGAGGCACCAGGGCCCTCCTGGAGATGCTCAACCTCCATCCAGATGTGGAAGTCGCCAAGACTGAGATCCATTACTTCA | 82  |
|            |     |                                                                                  |     |
| Reference  | 103 | AGGAGGCACCAGGGCCCTCCTGGAGATGCTCAACCTCCATCCAGATGTGGAAGTCGCCAAGACTGAGATCCATTACTTCA | 182 |
| Alt Allele | 83  | ACCTGGATGAAAACTTTCGGAAGGGTCTGGATTGGTATCGATCCCAGATGCCATCACCTTCTGGGCAGCTGACGGTG    | 162 |
|            |     |                                                                                  |     |
| Reference  | 183 | ACCTGGATGAAAACTTTCGGAAGGGTCTGGATTGGTATCGATCCCAGATGCCATCACCTTCTGGGCAGCTGACAGTG    | 262 |
| Alt Allele | 163 | GAAAAGACTCCTGGCTACTTCACAGCTCCACCAGCCCAAGGGGGCTT-----GAATCCAGCAGTGAAACTGCTTTT     | 234 |
|            |     |                                                                                  |     |
| Reference  | 263 | GAAAAGACTCCTGGCTACTTCACAGCTCCACCAGCCCAAGGAGGATTTGGGCCATGAATCCAGCAGTGAAACTGCTTTT  | 342 |
| Alt Allele | 235 | GATCATTTCGTGACCCCGCAGAGAGGCTMGATMAGWGTATA                                        | 275 |
|            |     |                                                                                  |     |
| Reference  | 343 | GATCATTTCGTGACCCCGCAGAGAGGCTCGTATCAGATTATA                                       | 383 |

### Alternative allele

BTAGGAGGCACCAGGGCCCTCCTGGAGATGCTCAACCTCCATCCAGATGTGGAAGTCGCCAAGACTGAGATCCATTACTTCAACCTGGATGAAAACTTTCGGAAGGGTCTGGATTGGTATCGATCCCAGATGCCATCACCTTCTGGGCAGCTGACGGTGAAAAAGACTCCTGGCTACTTCACAGCTCCACCAGCCCAAGGGGGCTTGAATCCAGCAGTGAAACTGCTTTTGTATCATCGTGACCCCGCAGAGAGGCTMGATMAGWGTATAAGATTAAGRTTTTGCAGRTRCGSYTATGTSCRAYCGCCA

### Reference sequence

ACAAGACACTTTGGACTTAGTGACTTCAGCGACACCTTCTGGACCTTCTAATGCTTCGACTTTGCAACGTCTCCAGGGGCCATCATCATCGGGGTGCGCAAAGGAGGCACCAGGGCCCTCCTGGAGATGCTCAACCTCCATCCAGATGTGGAAGTCGCCAAGACTGAGATCCATTACTTCAACCTGGATGAAAACTTTCGGAAGGGTCTGGATTGGTATCGATCCCAGATGCCATCACCTTCTGGGCAGCTGACAGTGAAAAAGACTCCTGGCTACTTCACAGCTCCACCAGCCCAAGGAGGATTTGGGCCATGAATCCAGCAGTGAAACTGCTTTTGTATCATTCGTGACCCCGCAGAGAGGCTCGTATCAGATTATACGCAAGTTCTCCACAACCGAATTCAGCAAAAACAGCCATACCAGTCACTGGAAGAGCTGCTGCTTTCACAAGGACACATCAACCCAAAATACAAGGCCTTCAGAGAAGTTTTACTACCAGCACCTGGCCAGATGGTTGGAGCTTTTCCCCGAGAGCAGATACACATTGTGGATGGAGAAGCACTGATTTCGTAATCCATTCCCGAGCTGCAGAAAGCAGAGACTTTTTTGAAGTTCCCGCTCAGATAAAGCCGGACAACCTTCTACTTTAATGTCACCAAGGGCTTTTATTGTATGCTGTCGGCAGGACATGACAAGTGCCTGGATGAGTCTAAAGGAAGGCCACATGCTCCACTTAGCAATGAGGCTTTCCAGAAGCTTTGCCGCTACTTGCAGTACCTAATCAAATCTTTTTCCGAATGGTGGGACAGAGGTTTG

### Alignment parameters



3ost5 line M21

```
#####  
# Program: Biostrings (version 2.26.3), a Bioconductor package  
# Rundate: Thu May 22 19:35:32 2014  
#####  
#=====  
#  
# Aligned_sequences: 2  
# 1: Alt Allele  
# 2: Reference  
# Matrix: NA  
# Gap_penalty: 12.0  
# Extend_penalty: 2.0  
#  
# Length: 281  
# Identity:      265/281 (94.3%)  
# Similarity:    NA/281 (NA%)  
# Gaps:          8/281 (2.8%)  
# Score: 800.2
```

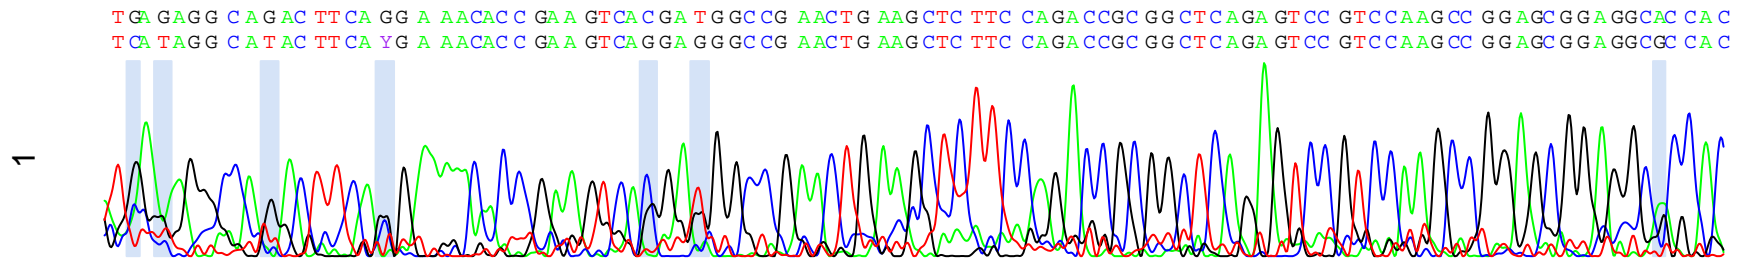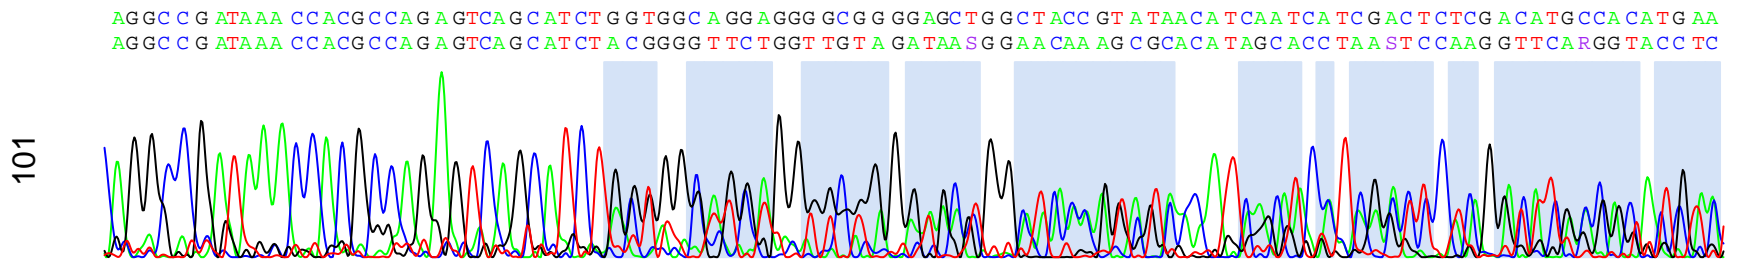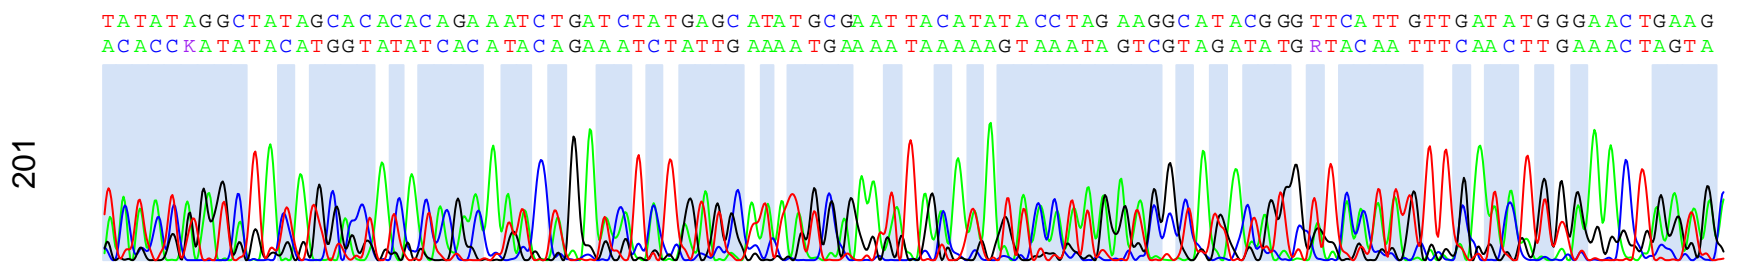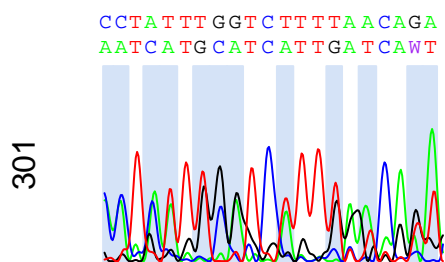

Left2 line 19

### Alignment

```

Alt Allele      8  CAACTTTCAYGAAA-CACCGAAGTCAGGAGGGCCGAACTGAAGCTCTTCCAGACCGCGGCTCAGAGTCCGTCCAAGCCGG      86
  || ||||| ||| ||||||||| || |||||||||||||||||||||||||||||||||||||||||||||
Reference      83  CAGACTTCAGGAAAACACCGAAGTCACGATGGCCGAACTGAAGCTCTTCCAGACCGCGGCTCAGAGTCCGTCCAAGCCGG      162

Alt Allele     87  AGCGGAGGCGCCACAGGCCGATAAAACCACGCCAGAGTCAGCATCTGGGGGCATCTGGGTGGAGGTGCKGGAAAACGGCTC      166
  ||||||| ||||||||||||||||||||||||||||||||||| ||||||||| |||||||||
Reference     163  AGCGGAGGCACCACAGGCCGATAAAACCACGCCAGAGTCAGCATCTA-----CTGGGTGGAGGTGCTGGAAAACGGCTC      235

Alt Allele     167  ACATAGAACATCASTCCTAGACTCASGGTATGACACAC      204
  ||||||||| ||||||||| |||||||||
Reference     236  CAATAGAACATCACTCCTAGACTCACGGTATGACACAC      273

```

### Alternative allele

```

TCATAGGCAKACTTTCAYGAAAACACCGAAGTCAGGAGGGCCGAACTGAAGCTCTTCCAGACCGCGGCTCAGAGTCCGTCCAAGCCGGAGCGGAGGCCACAGGCCGATAAAACCACGCCAG
AGTCAGCATCTGGGGGCATCTGGGTGGAGGTGCKGGAAAACGGCTCACATAGAACATCASTCCTAGACTCASGGTATGACACACYKRKMTACAGSRYAYAYCGMAATCWGATCTMTRTGS
AWAWGSAAAWTACATAKAMMAWRWSGYAKAYRKGDTMMWWKTTSAWMTKGRAACTRRWRMMTMWTKSRTCWTTKAWCADW

```

### Reference sequence

```

AATGCTTATGTTTAAACAGATATTACCGGAGAAAATCAAGTACTCGGACACCACCGTCAGCGTCTTGTGTTTCGACATGGAGGCCAGACTTCAGGAAAACACCGAAGTCACGATGGCCGAAC
TGAAGCTCTTCCAGACCGCGGCTCAGAGTCCGTCCAAGCCGGAGCGGAGGCCACACAGGCCGATAAAACCACGCCAGAGTCAGCATCTACTGGGTGGAGGTGCTGGAAAACGGCTCCAATA
GAACATCACTCCTAGACTCACGGTATGACACACCTATATAAATCTGATATATATGGAAATATATGCTAATTACATAGGCTTAGATGGCATAACATGTT

```

### Alignment parameters

```

#####
# Program: Biostrings (version 2.26.3), a Bioconductor package
# Runday: Thu May 22 20:10:05 2014
#####
#=====
#
# Aligned_sequences: 2

```

Left2 line 19

```
# 1: Alt Allele
# 2: Reference
# Matrix: NA
# Gap_penalty: 12.0
# Extend_penalty: 2.0
#
# Length: 198
# Identity:      179/198 (90.4%)
# Similarity:   NA/198 (NA%)
# Gaps:         8/198 (4.0%)
# Score: 512
```
